# Supplementary material
Source: PubMed Central journal article supplement (PMC5523404)
Supplement: NIHMS879951-supplement-Supporting_Information.pdf [file NIHMS879951-supplement-Supporting_Information.pdf]

# Supporting Information

## Lipid Nanoparticle–Assisted mRNA Delivery for Potent Cancer Immunotherapy

*Matthias A. Oberli<sup>‡</sup>◇, Andreas M. Reichmuth<sup>‡</sup>◇, J. Robert Dorkin<sup>‡</sup>, Michael J.*

*Mitchell<sup>‡</sup>, Owen S. Fenton<sup>‡</sup>§, Ana Jaklenec<sup>‡</sup>, Daniel G. Anderson<sup>◇</sup>†§,*

*Robert Langer<sup>‡</sup>◇†§, Daniel Blankschtein<sup>\*◇</sup>*

◇Department of Chemical Engineering, ‡David H. Koch Institute for Integrative Cancer Research, †Institute for Medical Engineering and Science, §Department of Chemistry, and |Harvard-MIT Division of Health Sciences and Technology, Massachusetts Institute of Technology, Cambridge, Massachusetts 02139, United States

§Department of Anesthesiology, Boston Children's Hospital, Harvard Medical School, Boston, Massachusetts 02115, United States

E-mail: dblank@mit.edu

**Figure S1.** Correlation of the obtained CD 8 T cell levels on the molar percentage of cKK-E12 in formulations evaluated in Library B. The T cell levels seem to increase upon lowering the percentage of cKK-E12.

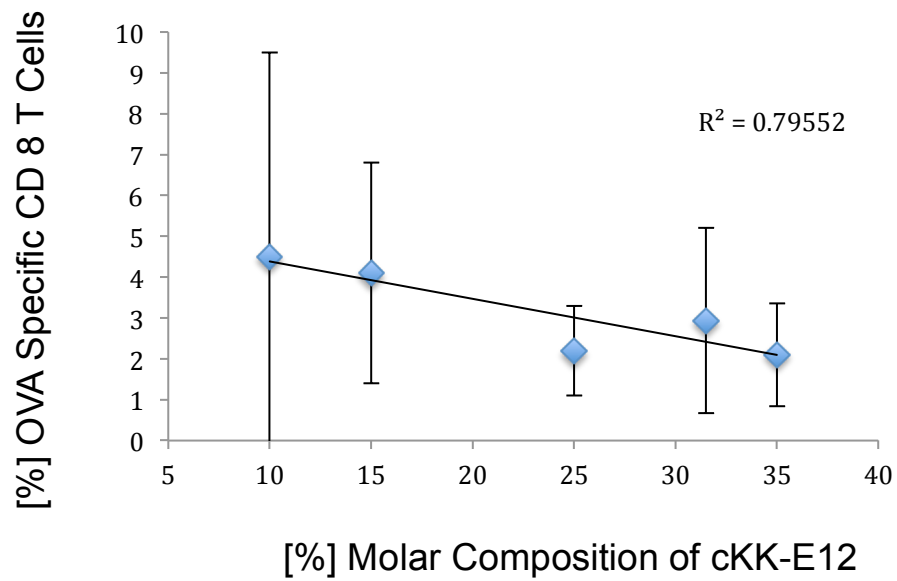

**Table S1.** Parameters for the preparation of LNP formulations used in this study, including characterization and efficacy of Libraries A and B for elucidating an antigen specific Cd 8 T cell response in mice *in vivo*.

| Code                        | A                | A-1              | A-2              | A-3              | A-4              | A-5              | A-6              | A-7              | A-8              |
|-----------------------------|------------------|------------------|------------------|------------------|------------------|------------------|------------------|------------------|------------------|
| ionizable lipid/mRNA        | 10               | 10               | 10               | 10               | 10               | 10               | 10               | 10               | 10               |
| ionizable lipid             | C12-200          | C12-200          | cKK-E12          | 503O13           | DOTAP            | DODAP            | C12-200          | C12-200          | C12-200          |
| Mol %                       | 31.5             | 31.5             | 31.5             | 31.5             | 31.5             | 31.5             | 31.5             | 31.5             | 31.5             |
| phospho lipid               | DOPE             | DOPE             | DOPE             | DOPE             | DOPE             | DOPE             | DSPC             | DOTAP            | POPE             |
| Mol %                       | 10               | 0                | 10               | 10               | 10               | 10               | 10               | 10               | 10               |
| cholesterol                 | Cholesterol      | Cholesterol      | Cholesterol      | Cholesterol      | Cholesterol      | Cholesterol      | Cholesterol      | Cholesterol      | Cholesterol      |
| Mol %                       | 36               | 36               | 36               | 36               | 36               | 36               | 36               | 36               | 36               |
| PEG lipid                   | C14-PEG1000      |
| Mol %                       | 2.5              | 2.5              | 2.5              | 2.5              | 2.5              | 2.5              | 2.5              | 2.5              | 2.5              |
| additive                    | Arachidonic acid |
| Mol %                       | 20               | 30               | 20               | 20               | 20               | 20               | 20               | 20               | 20               |
| Peak 1 (nm)                 | 121              | 129              | 76.35            | 82.15            | 114.1            | 218.6            | 89.29            | 125.9            | 123.9            |
| Peak 1 (%)                  | 97.3             | 98.6             | 100              | 91               | 96.6             | 54               | 100              | 98.6             | 96.2             |
| PDI                         | 0.388            | 0.173            | 0.101            | 0.254            | 0.304            | 0.429            | 0.126            | 0.147            | 0.342            |
| %entrapment                 | 83.31            | 47.00            | 93.05            | 94.92            | 78.24            | 96.97            | 92.54            | 86.54            | 96.32            |
| %-OVA specific CD8 (@day 7) | 1.14             | 0.42             | 2.94             | 0.98             | 0.16             | 0.2              | 3.12             | 0.92             | 1.55             |
| Standard deviation          | 1.29             | 0.28             | 2.27             | 1.41             | 0.06             | 0.13             | 1.58             | 0.84             | 1.30             |

| Code                        | A-9              | A-10             | A-11             | A-12             | A-13             | A-14             | A-15             | A-16        | A-17          |
|-----------------------------|------------------|------------------|------------------|------------------|------------------|------------------|------------------|-------------|---------------|
| ionizable lipid/mRNA        | 10               | 10               | 10               | 10               | 10               | 10               | 10               | 10          | 10            |
| ionizable lipid             | C12-200          | C12-200     | C12-200       |
| Mol %                       | 31.5             | 31.5             | 31.5             | 31.5             | 31.5             | 31.5             | 31.5             | 31.5        | 31.5          |
| phospho lipid               | DMPC             | DOPS             | DOPE             | DOPE             | DOPE             | DOPE             | DOPE             | DOPE        | DOPE          |
| Mol %                       | 10               | 10               | 10               | 10               | 10               | 10               | 10               | 10          | 10            |
| cholesterol                 | Cholesterol      | Cholesterol      | DC-cholester     | Cholesterol      | Cholesterol      | Cholesterol      | Cholesterol      | Cholesterol | Cholesterol   |
| Mol %                       | 36               | 36               | 36               | 36               | 36               | 36               | 36               | 36          | 36            |
| PEG lipid                   | C14-PEG1000      | C14-PEG1000      | C14-PEG1000      | C14-PEG2000      | C14-PEG350       | C14-PEG3000      | C18-PEG2000      | C14-PEG1000 | C14-PEG1000   |
| Mol %                       | 2.5              | 2.5              | 2.5              | 2.5              | 2.5              | 2.5              | 2.5              | 2.5         | 2.5           |
| additive                    | Arachidonic acid | Oleic Acid  | Myristic acid |
| Mol %                       | 20               | 20               | 20               | 20               | 20               | 20               | 20               | 20          | 20            |
| Peak 1 (nm)                 | 63.7             | 79               | 69.11            | 67.53            | 232.4            | 96.4             | 110              | 64.43       | 77.66         |
| Peak 1 (%)                  | 100              | 95               | 100              | 100              | 100              | 100              | 72               | 98.2        | 94.6          |
| PDI                         | 0.172            | 0.228            | 0.18             | 0.161            | 0.144            | 0.182            | 0.297            | 0.166       | 0.227         |
| %entrapment                 | 88.41            | 92.70            | 87.54            | 52.51            | 62.09            | 64.99            | 84.90            | 80.76       | 89.28         |
| %-OVA specific CD8 (@day 7) | 0.9              | 2.8              | 0.84             | 2                | 0.14             | 1.2              | 0.5              | 1.64        | 0.98          |
| Standard deviation          | 0.73             | 1.69             | 1.43             | 2.21             | 0.11             | 0.40             | 0.27             | 1.77        | 0.68          |

| Code                        | A-18                  | A-19             | B-1              | B-2              | B-3                   | B-4              | B-5              | B-6              | B-7              |
|-----------------------------|-----------------------|------------------|------------------|------------------|-----------------------|------------------|------------------|------------------|------------------|
| ionizable lipid/mRNA        | 10                    | 10               | 10               | 10               | 10                    | 10               | 10               | 5                | 10               |
| ionizable lipid             | C12-200               | C12-200          | cKK-E12          | cKK-E12          | cKK-E12               | cKK-E12          | cKK-E12          | cKK-E12          | cKK-E12          |
| Mol %                       | 31.5                  | 35               | 35               | 35               | 32.5                  | 25               | 25               | 35               | 25               |
| phospho lipid               | DOPE                  | DOPE             | DOPE             | DOPS             | DOPE                  | DOPE             | DOPE             | DOPE             | DOPS             |
| Mol %                       | 10                    | 16               | 16               | 16               | 7.5                   | 26               | 37.5             | 16               | 37.5             |
| cholesterol                 | Cholesterol           | Cholesterol      | Cholesterol      | Cholesterol      | Cholesterol           | Cholesterol      | Cholesterol      | Cholesterol      | Cholesterol      |
| Mol %                       | 36                    | 46.5             | 46.5             | 46.5             | 43                    | 46.5             | 35               | 46.5             | 35               |
| PEG lipid                   | C14-PEG1000           | C14-PEG1000      | C14-PEG2000      | C14-PEG2000      | C14-PEG2000           | C14-PEG2000      | C14-PEG2000      | C14-PEG2000      | C14-PEG2000      |
| Mol %                       | 2.5                   | 2.5              | 2.5              | 2.5              | 2.5                   | 2.5              | 2.5              | 2.5              | 2.5              |
| additive                    | Sodium Lauryl Sulfate | Arachidonic acid | Arachidonic acid | Arachidonic acid | Sodium Lauryl Sulfate | Arachidonic acid | Arachidonic acid | Arachidonic acid | Arachidonic acid |
| Mol %                       | 20                    | 0                | 0                | 0                | 14.5                  | 0                | 0                | 0                | 0                |
| Peak 1 (nm)                 | 108                   | 41.38            | 120              | 101              | 80.3                  | 86.6             | 104              | 103              |                  |
| Peak 1 (%)                  | 100                   | 60               | 97               | 97               | 97                    | 99               | 99               | 97               |                  |
| PDI                         | 0.166                 | 0.299            | 0.266            | 0.283            | 0.192                 | 0.25             | 0.223            | 0.258            |                  |
| %entrapment                 | 87.10                 | 59.79            | 81.60            | 90.00            | 82.10                 | 87.20            | 91.30            | 88.80            | 58.73            |
| %-OVA specific CD8 (@day 7) | 3.1                   | 2.86             | 2.1              | 4.1              | 2.1                   | 2.2              | 3.7              | 1.8              | 0.5              |
| Standard deviation          | 0.75                  | 2.54             | 1.26             | 2.80             | 0.98                  | 1.10             | 3.48             | 1.68             | 0.17             |

| Code                        | B-8              | B-9              | B-10             | B-11                  | B-12             | B-13                  |
|-----------------------------|------------------|------------------|------------------|-----------------------|------------------|-----------------------|
| ionizable lipid/mRNA        | 10               | 10               | 5                | 10                    | 10               | 10                    |
| ionizable lipid             | cKK-E12          | cKK-E12          | cKK-E12          | cKK-E12               | cKK-E12          | cKK-E12               |
| Mol %                       | 15               | 15               | 15               | 15                    | 10               | 15                    |
| phospho lipid               | DOPE             | DOPE             | DOPE             | DOPE                  | DOPE             | DOPS                  |
| Mol %                       | 26               | 47.5             | 47.5             | 26                    | 26               | 26                    |
| cholesterol                 | Cholesterol      | Cholesterol      | Cholesterol      | Cholesterol           | Cholesterol      | Cholesterol           |
| Mol %                       | 56.5             | 35               | 35               | 40.5                  | 61.5             | 56.5                  |
| PEG lipid                   | C14-PEG2000      | C14-PEG2000      | C14-PEG2000      | C14-PEG2000           | C14-PEG2000      | C14-PEG2000           |
| Mol %                       | 2.5              | 2.5              | 2.5              | 2.5                   | 2.5              | 2.5                   |
| additive                    | Arachidonic acid | Arachidonic acid | Arachidonic acid | Sodium Lauryl Sulfate | Arachidonic acid | Sodium Lauryl Sulfate |
| Mol %                       | 0                | 0                | 0                | 16                    | 0                | 0                     |
| Peak 1 (nm)                 | 75.15            | 93.62            | 57.21            | 152.2                 | 121.3            | 111.1                 |
| Peak 1 (%)                  | 96.4             | 100              | 60               | 100                   | 100              | 97.7                  |
| PDI                         | 0.229            | 0.291            | 0.326            | 0.217                 | 0.241            | 0.243                 |
| %entrapment                 | 90.90            | 85.17            | 64.21            | 84.07                 | 91.96            | 47.47                 |
| %-OVA specific CD8 (@day 7) | 4.1              | 2.7              | 1.9              | 4.2                   | 4.5              | 1.7                   |
| Standard deviation          | 2.70             | 1.60             | 1.60             | 1.50                  | 5.00             | 0.52                  |

**Figure S2.** Only low levels of OVA specific IgG antibodies were detected 7 weeks after a single immunization. At dilutions of 1:16 or smaller, the OVA specific IgG titers of treated mice were more than a standard deviation from the control group, mice treated with irrelevant mRNA containing LNP. The irrelevant mRNA used for this study was coding for Beta galactosidase.

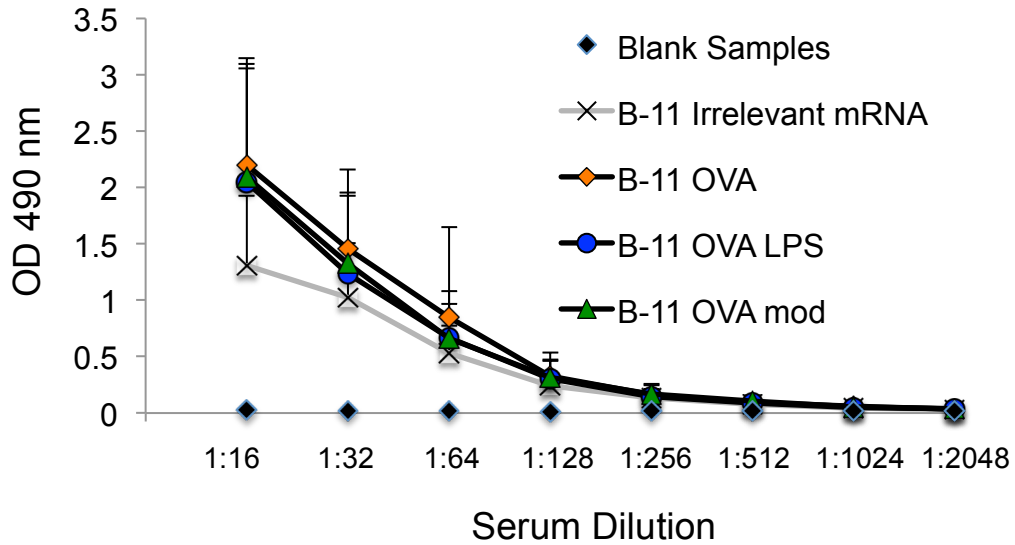

**Figure S3.** Among the formulations tested (Table S1) there was no correlation between: Particle size and CD 8 T cell expansion (A), Zeta potential and CD 8 T cell expansion (B), and Zeta potential and Z-average. Each dot represents an entry from the formulation optimization (Table S1).

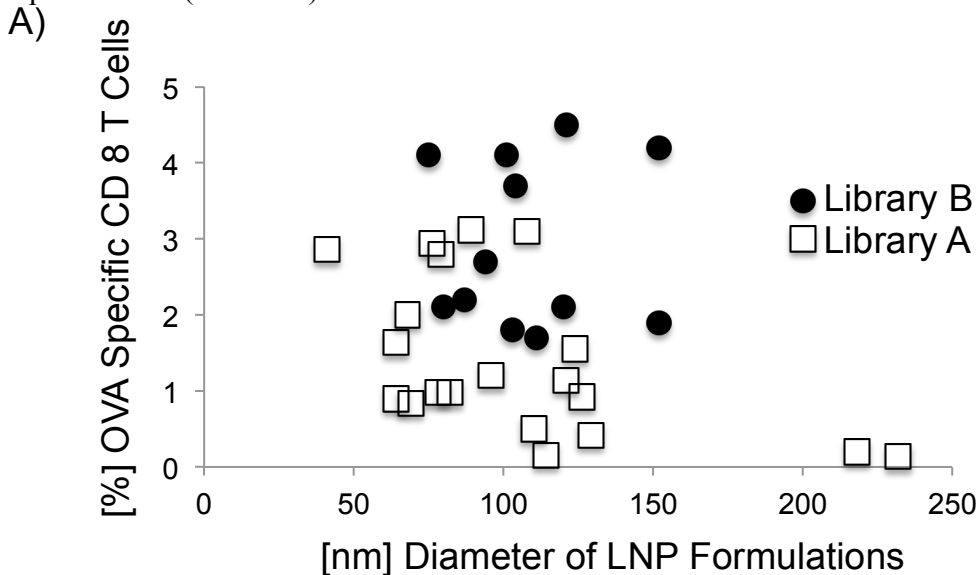

B)

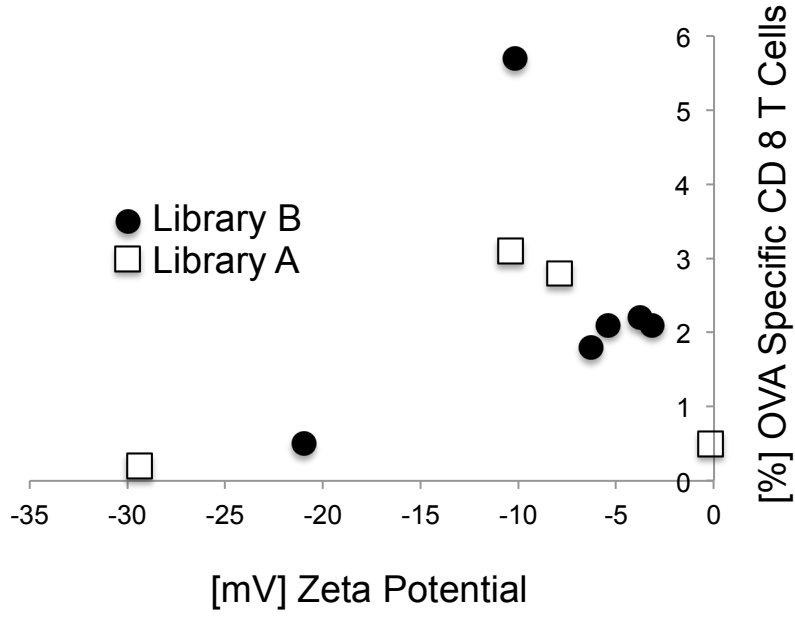

C)

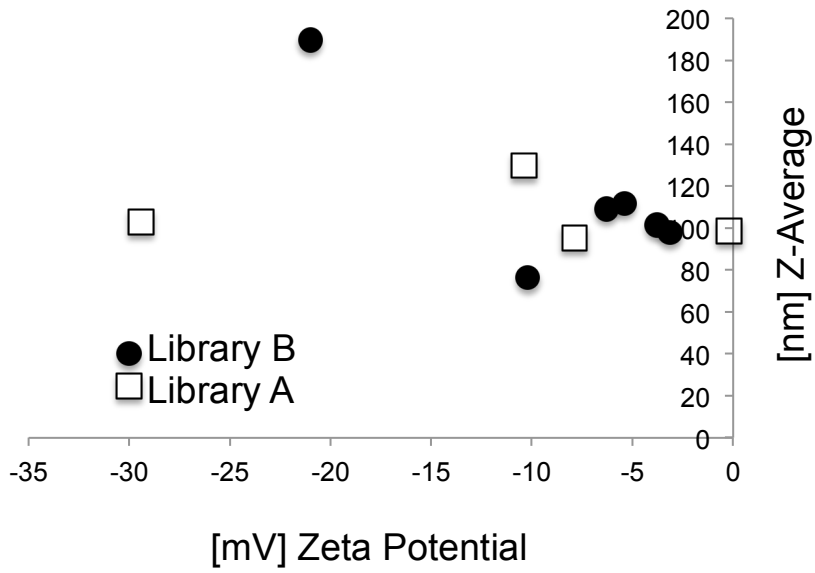



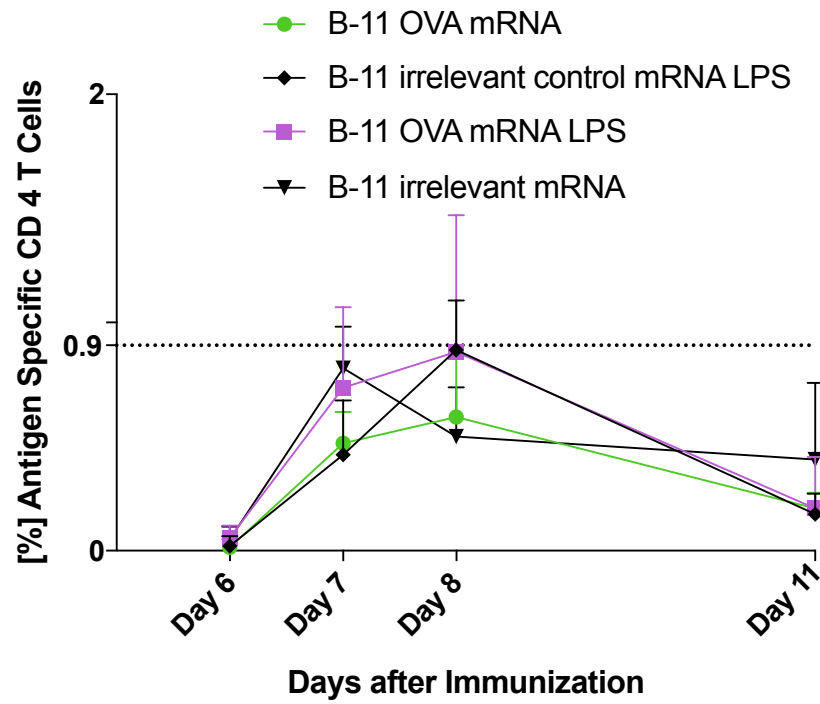

**Figure S4.** Percent circulating, antigen specific CD 4 T cells in the peripheral blood. The groups are not statistically significant different. LNP containing mRNA coding for  $\beta$ -Galactosidase was used as irrelevant control.
